# Supplementary material for: Antifungal and anti-inflammatory potential of the endangered aromatic plant Thymus albicans
Source: PubMed Central journal article supplement (PMC7608662; doi:10.1038/s41598-020-75244-w), 2020-11-02
Supplement: 41598_2020_75244_MOESM1_ESM.pdf [file 41598_2020_75244_MOESM1_ESM.pdf]

## Supplementary Information

### Antifungal and anti-inflammatory potential of the endangered aromatic plant *Thymus albicans*

Mariana Roxo<sup>1</sup>, Mónica Zuzarte<sup>2,3,4\*</sup>, Maria José Gonçalves<sup>5,6</sup>, Jorge M. Alves-Silva<sup>2,3,4,5</sup>, Carlos Cavaleiro<sup>5,6</sup>, Maria Teresa Cruz<sup>3,5,7</sup>, Lúgia Salgueiro<sup>5,6</sup>

<sup>1</sup> Institute of Pharmacy and Molecular Biotechnology (IPMB), Heidelberg University, Heidelberg, Germany

<sup>2</sup> Faculty of Medicine, Coimbra Institute for Clinical and Biomedical Research (iCBR), University of Coimbra, Coimbra, Portugal

<sup>3</sup> Centre for Innovative Biomedicine and Biotechnology (CIBB), University of Coimbra, Coimbra, Portugal

<sup>4</sup> Clinical Academic Centre of Coimbra (CACC), Coimbra, Portugal

<sup>5</sup> Faculty of Pharmacy of the University of Coimbra, University of Coimbra, Coimbra, Portugal

<sup>6</sup> Chemical Process Engineering and Forest Products Research Centre (CIEPQPF), Department of Chemical Engineering, Faculty of Sciences and Technology University of Coimbra, Coimbra, Portugal

<sup>7</sup> Center for Neuroscience and Cell Biology (CNC), Coimbra, Portugal

**Corresponding author:** Mónica Zuzarte, mzuzarte@uc.pt, Faculty of Medicine, University of Coimbra, Azinhaga de S. Comba, 3000-354 Coimbra, Portugal. Tel: +351239480220

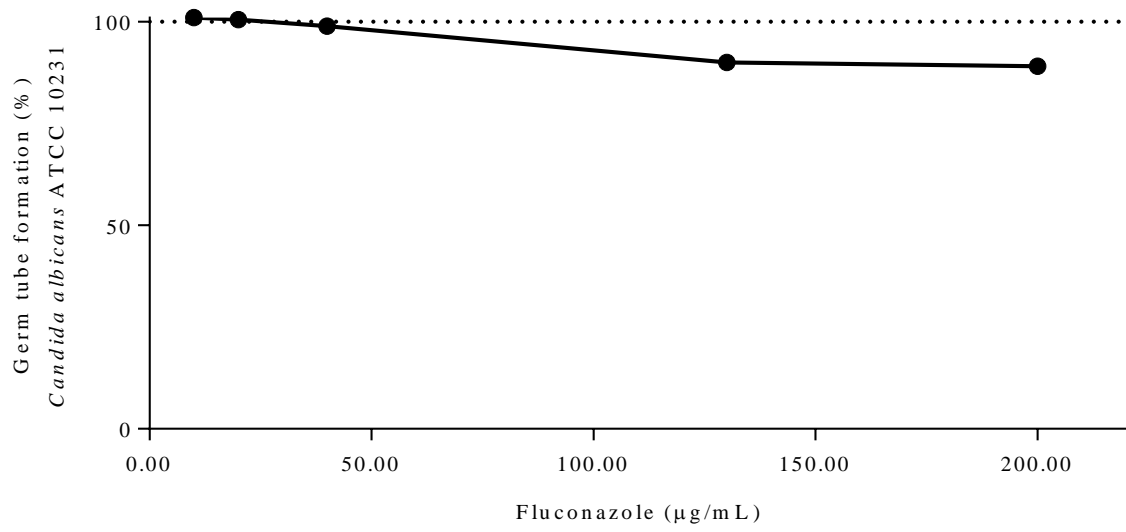

**Figure S1.** Germ tube formation in *Candida albicans* ATCC 10231 treated with fluconazole.

iNOS

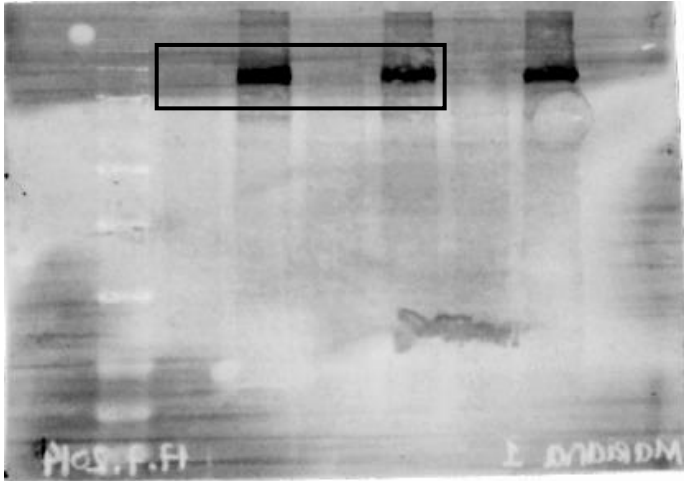

Tubulin

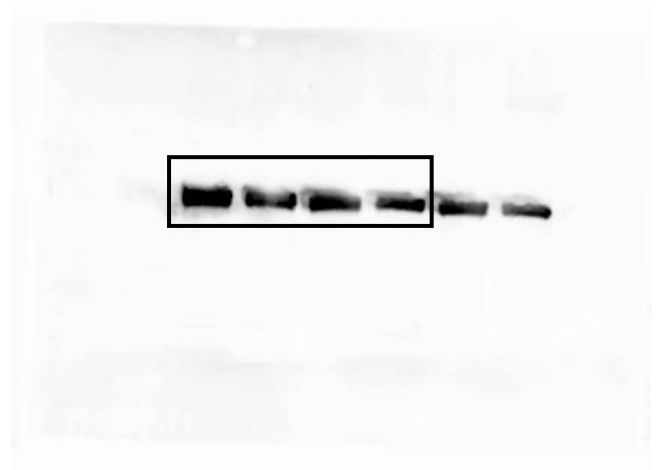

COX-2

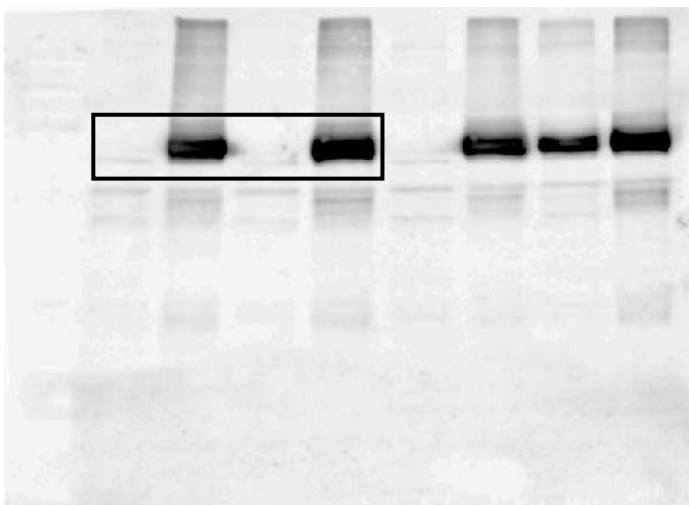

Tubulin

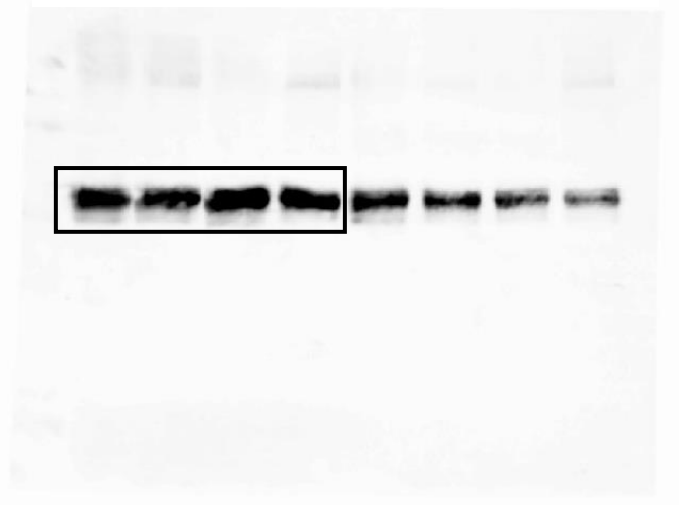

**Figure S2.** Original blots with cropped region marked.
